# Supplementary material
Source: MDPI journal article supplement (https://www.mdpi.com/2304-6740/11/2/69)
Supplement: s1 [file s1]

# Supplementary Materials

## Reversible Conversion between Lithium Superoxide and Lithium Peroxide: A Closed “Lithium–Oxygen” Battery

Junkai Wang <sup>1</sup>, Rui Gao <sup>1</sup> and Xiangfeng Liu <sup>1,2,\*</sup>

<sup>1</sup> College of Materials Science and Opto-Electronic Technology, University of Chinese Academy of Sciences, Beijing 100049, China

<sup>2</sup> CAS Center for Excellence in Topological Quantum Computation, University of Chinese Academy of Sciences, Beijing 100190, China

\* Correspondence: liuxf@ucas.ac.cn

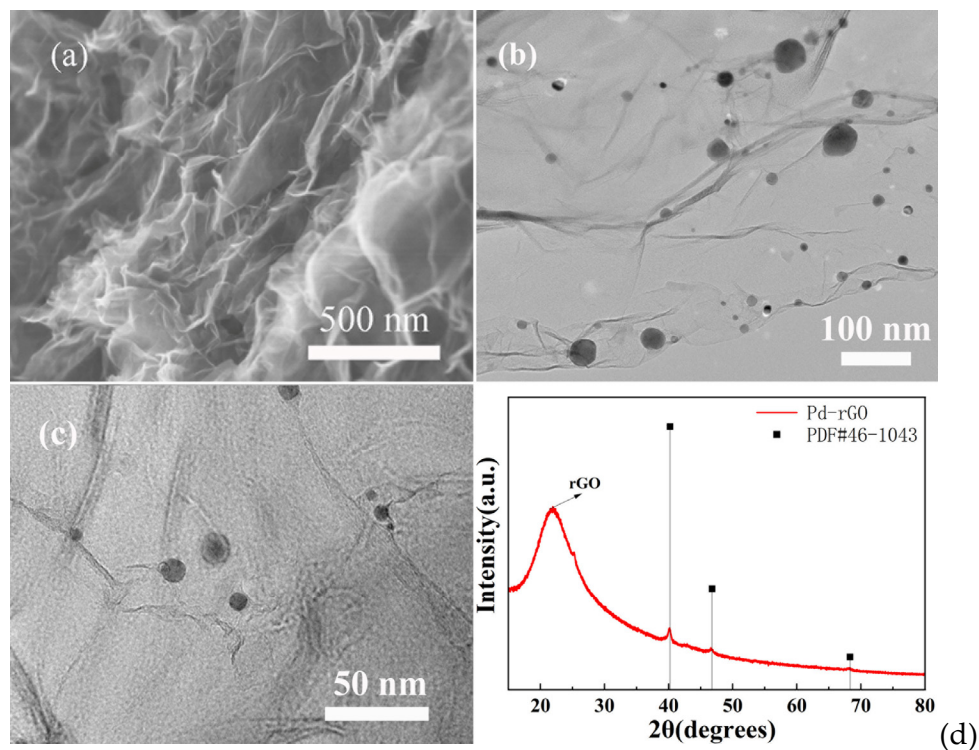

**Figure S1.** (a) SEM images of Pd-rGO; (b) and (c) TEM image and HRTEM of Pd-rGO, respectively; (d) the XRD patterns of Pd-rGO.

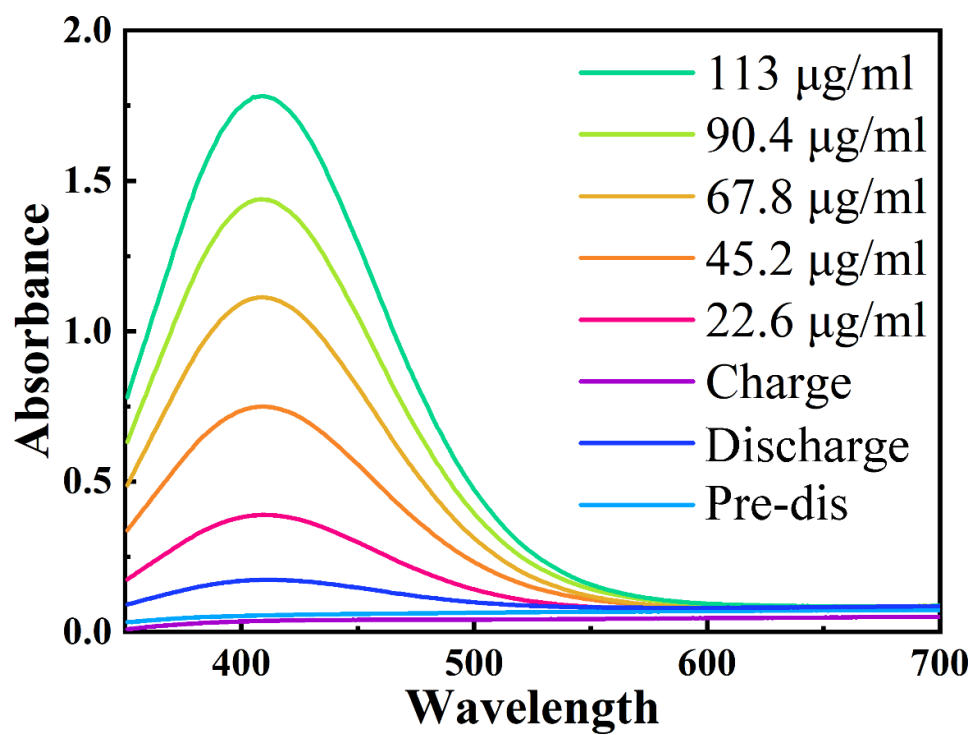

**Figure S2.** UV-Vis of Pd-rGO Li-O<sub>2</sub> battery. Cathodes with different discharge-specific capacities are immersed in a mixed solution of TiOSO<sub>4</sub>/H<sub>2</sub>SO<sub>4</sub> reagent and sulfuric acid.

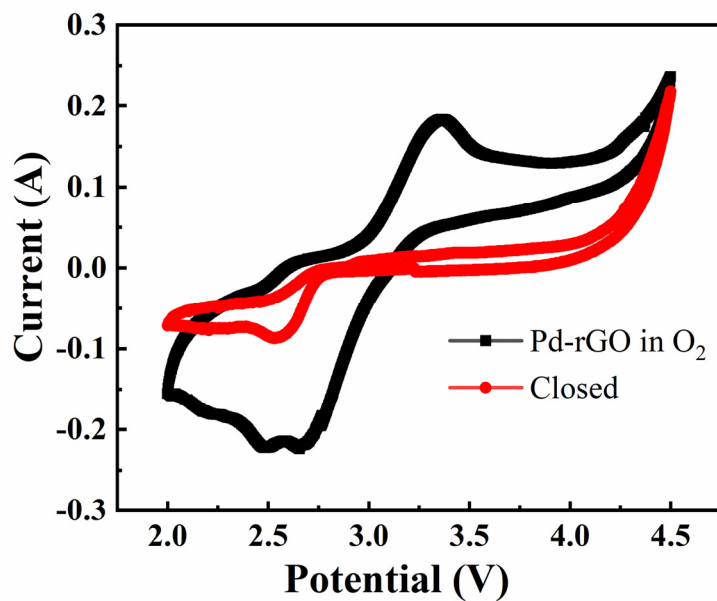

**Figure S3.** CV curves of Pd-rGO tested in an O<sub>2</sub> environment and a closed battery in the LiTFSI/TEGDME electrolyte at a scan rate of 0.1 mV s<sup>-1</sup>.

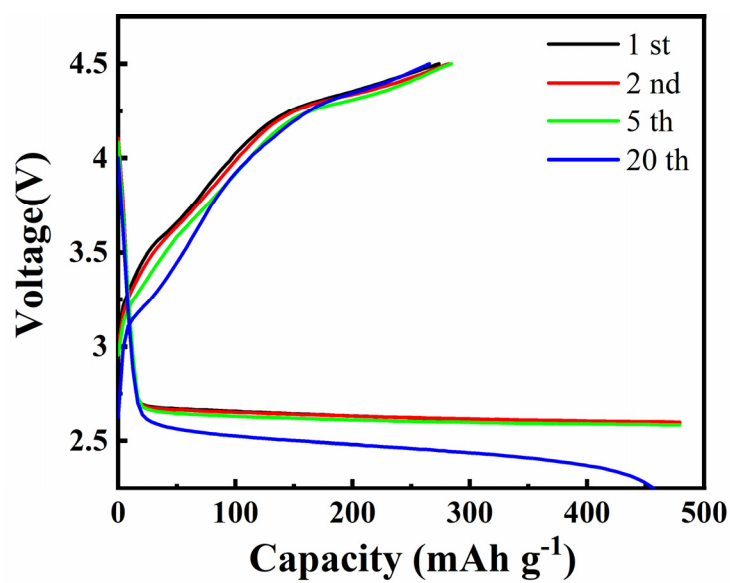

Figure S4. The cycle data of rGO closed batteries at 500 mA g<sup>-1</sup>.
